# Supplementary material for: Promiscuous targeting of polytopic membrane proteins to SecYEG or YidC by the Escherichia coli signal recognition particle
Source: PubMed Central journal article supplement — Mol Biol Cell. 2012 Feb 1;23(3):464–79. doi: 10.1091/mbc.E11-07-0590 (PMC3268725; doi:10.1091/mbc.e11-07-0590), 2012-02-01
Supplement: supp_E11-07-0590v1_CombinedSupMats.pdf [file supp_E11-07-0590v1_CombinedSupMats.pdf]

## Supplementary Material to

Promiscuous targeting of polytopic membrane proteins to SecYEG or YidC by the *E. coli*

Signal Recognition Particle

Thomas Welte\*||, Renuka Kudva\*†‡||, Patrick Kuhn\*†, Lukas Sturm\*, David Braig\*,

Matthias Müller\*‡, Bettina Warscheid†§, Friedel Drepper†§ and Hans-Georg Koch\*‡

\*Institut für Biochemie und Molekularbiologie, ZBMZ, and †Fakultät für Biologie, and

‡Spemann Graduate School of Biology and Medicine, and §BIOSS Centre for Biological

Signalling Studies, Albert-Ludwigs-Universität Freiburg, 79104 Freiburg, Germany

|| Both authors contributed equally to this work and should be considered equal first authors

Correspondence to Hans-Georg Koch

Institut für Biochemie und Molekularbiologie, ZBMZ

Albert-Ludwigs-Universität Freiburg

Stefan-Meier-Strasse 17, 79104 Freiburg

[Hans-Georg.Koch@biochemie.uni-freiburg.de](mailto:Hans-Georg.Koch@biochemie.uni-freiburg.de)

Phone: 0049-761-2035250

Fax: 0049-761-2035289

Running title: SRP-dependent targeting to YidC or SecYEG

## Legends to Supplementary Figures

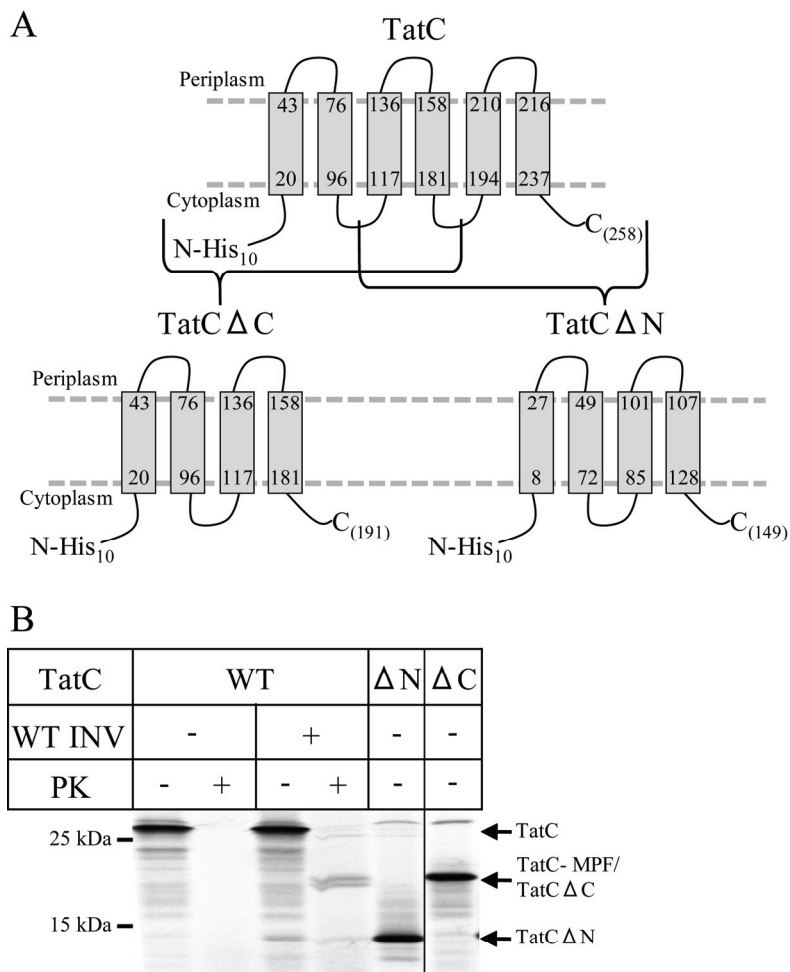

Welte et al., Suppl. Fig.1

### Supplementary Fig. 1 Defining the membrane-protected fragment of TatC.

(A) Cartoon showing the topology of TatC and of two truncated TatC-derivatives. (B) TatC, TatCΔC and TatCΔN were *in vitro* synthesized as described in the legend to Fig. 2. TatC was synthesized in the presence of INV and one portion was subsequently treated with proteinase K (PK). The full-length proteins and the TatC membrane-protected fragment (MPF) are indicated.

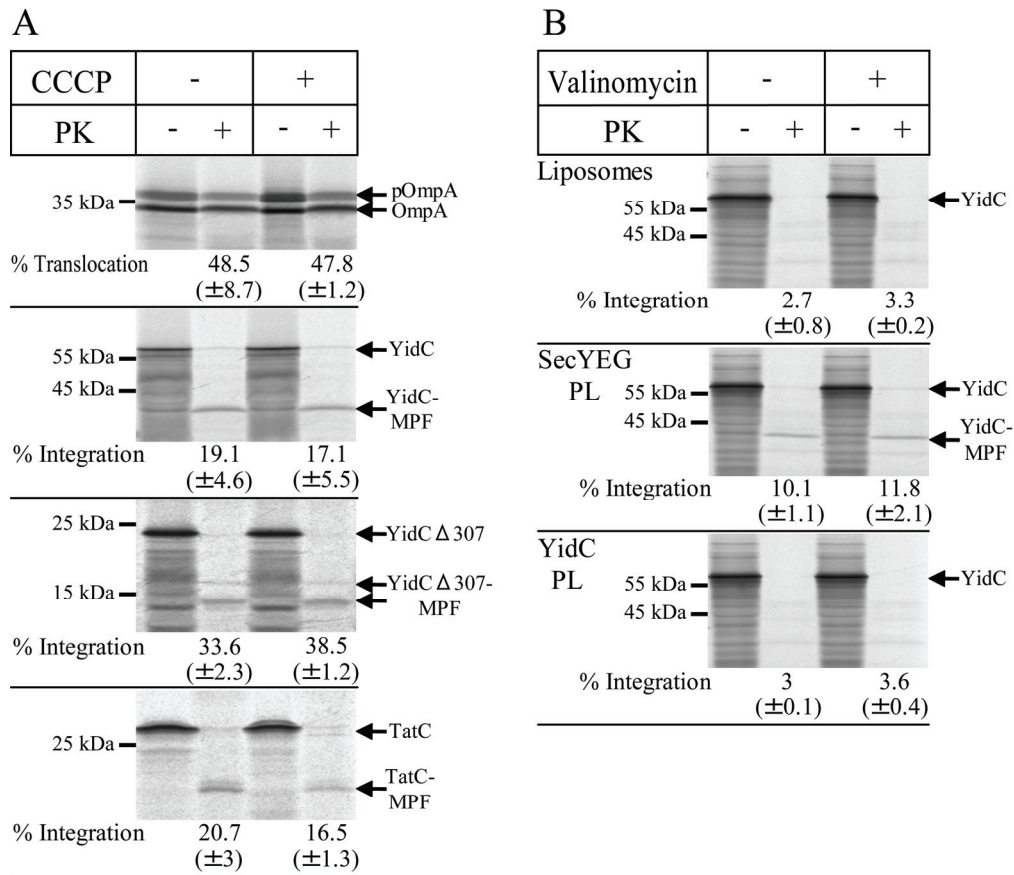

Welte et al., Suppl.  
Fig. 2

**Supplementary Fig. 2 The proton-motive-force does not significantly influence transport of OmpA, YidC, YidCΔ307 or TatC.**

The proteins were *in vitro* synthesized in the presence of INVs and when indicated 100μM CCCP was added. pOmpA corresponds to signal sequence-containing OmpA, while OmpA is the mature form. For the inner membrane proteins, full size proteins and membrane-protected fragments are indicated. (B) YidC was synthesized in 100 mM KOAc buffer in the presence of SRP, FtsY, SecA and liposomes/proteoliposomes loaded with 100 mM Na<sub>2</sub>SO<sub>4</sub> as described in the material and methods and in the legend to Fig.5. For generating a membrane potential, Valinomycin was added to a final concentration of 0.4 μM.
